# Supplementary material for: Anti-Inflammatory Effects of (9Z,11E)-13-Oxooctadeca-9,11-dienoic Acid (13-KODE) Derived from Salicornia herbacea L. on Lipopolysaccharide-Stimulated Murine Macrophage via NF-kB and MAPK Inhibition and Nrf2/HO-1 Signaling Activation
Source: MDPI journal article supplement (doi:10.3390/antiox11020180), 2022-01-18
Supplement: s1 [file s1]

**Table S1. Specific Real-time RT-qPCR primer sequences containing *iNOS*, *IL-1 $\beta$* , *TNF- $\alpha$* , and  *$\beta$ -actin* genes**

| <b>Genes</b>                    | <b>Primers</b>                                                                                                                        |
|---------------------------------|---------------------------------------------------------------------------------------------------------------------------------------|
| <b>iNOS</b>                     | <ul style="list-style-type: none"> <li>Forward: 5'-CGAGACGGATAGGCAGAGATTG-3'</li> <li>Reverse: 5'-CTCTTCAAGCACCTCCAGGAA-3'</li> </ul> |
| <b>IL-1<math>\beta</math></b>   | <ul style="list-style-type: none"> <li>Forward: 5'-GGGCCTCAAAGGAAAGAATC-3'</li> <li>Reverse: 5'-TACCAGTTGGGGAAGTCTGC-3'</li> </ul>    |
| <b>TNF-<math>\alpha</math></b>  | <ul style="list-style-type: none"> <li>Forward: 5'-CAGGCGGTGCCTATGTCTC-3'</li> <li>Reverse: 5'-CGATCACCCCGAAGTTCAGTAG-3'</li> </ul>   |
| <b><math>\beta</math>-actin</b> | <ul style="list-style-type: none"> <li>Forward: 5'-CCACAGCTGAGAGGAAATC-3'</li> <li>Reverse: 5'-AAGGAAGGCTGGAAAAGAGC-3'</li> </ul>     |

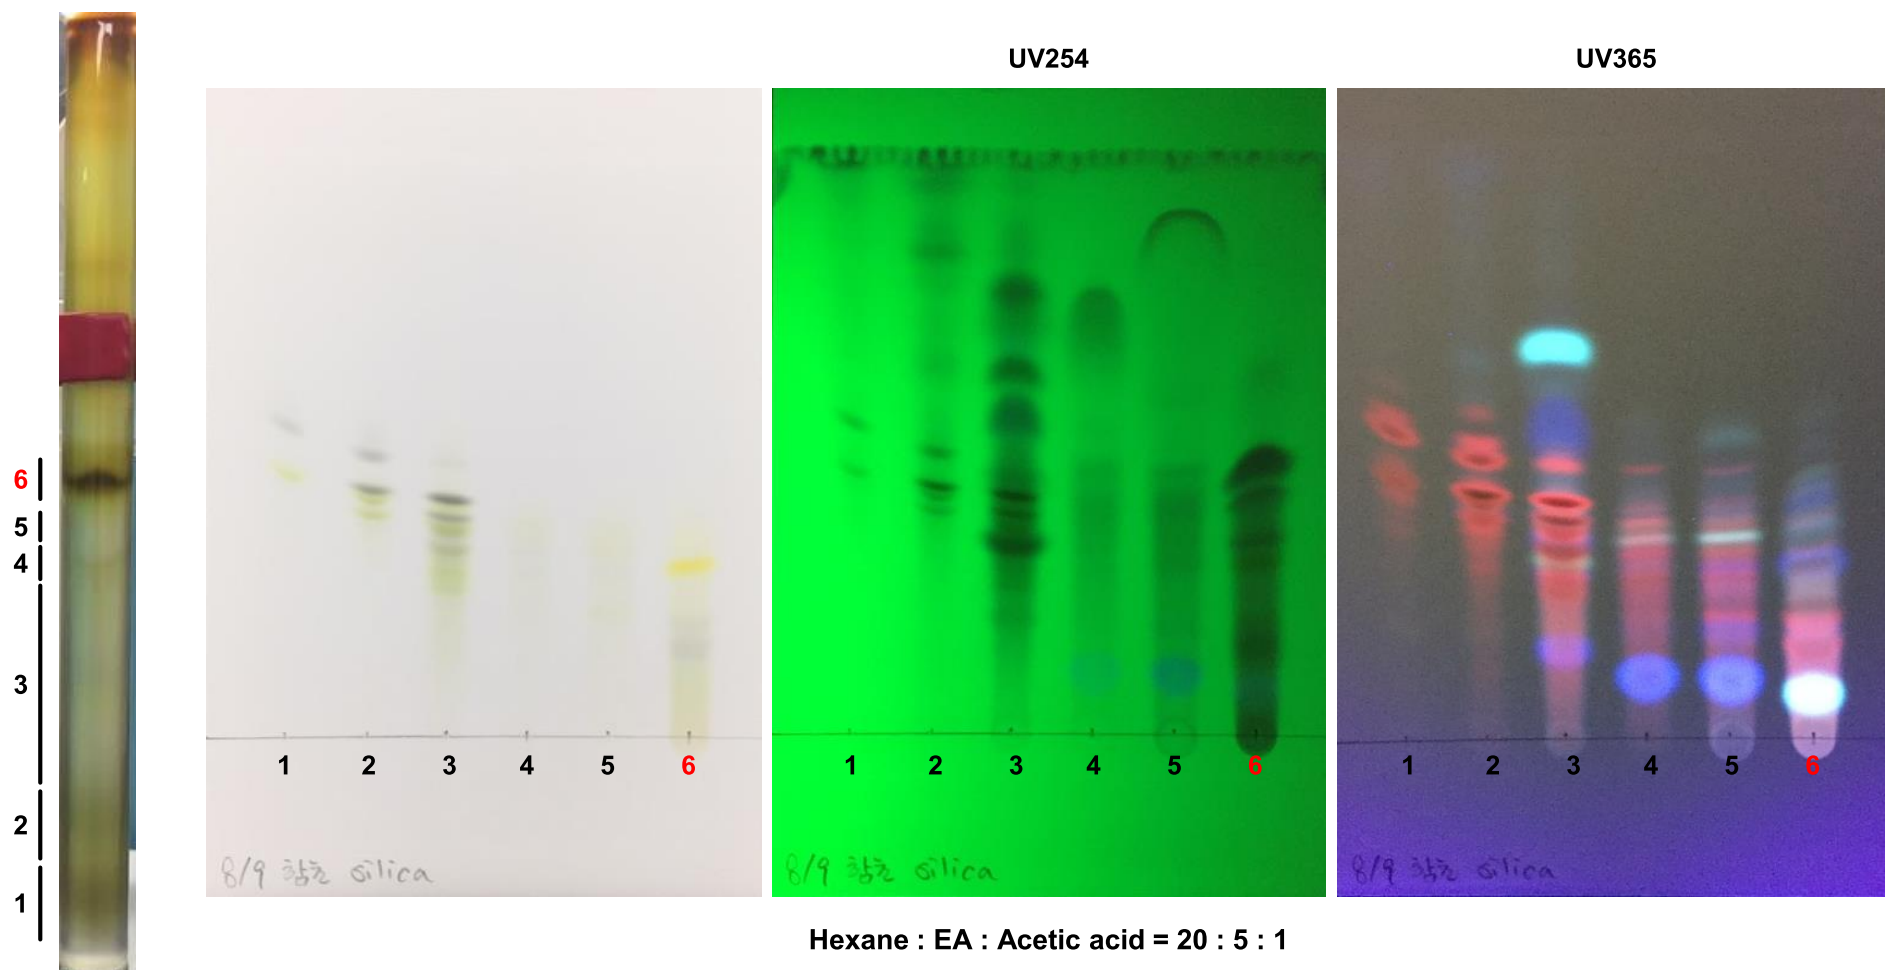

**Supplementary Figure S1. Purification procedure of antioxidant from *Salicornia herbacea* L. extracts using SiO<sub>2</sub> gel chromatography eluted with CHCl<sub>3</sub> : MeOH (30:1). Active fraction: #6.**

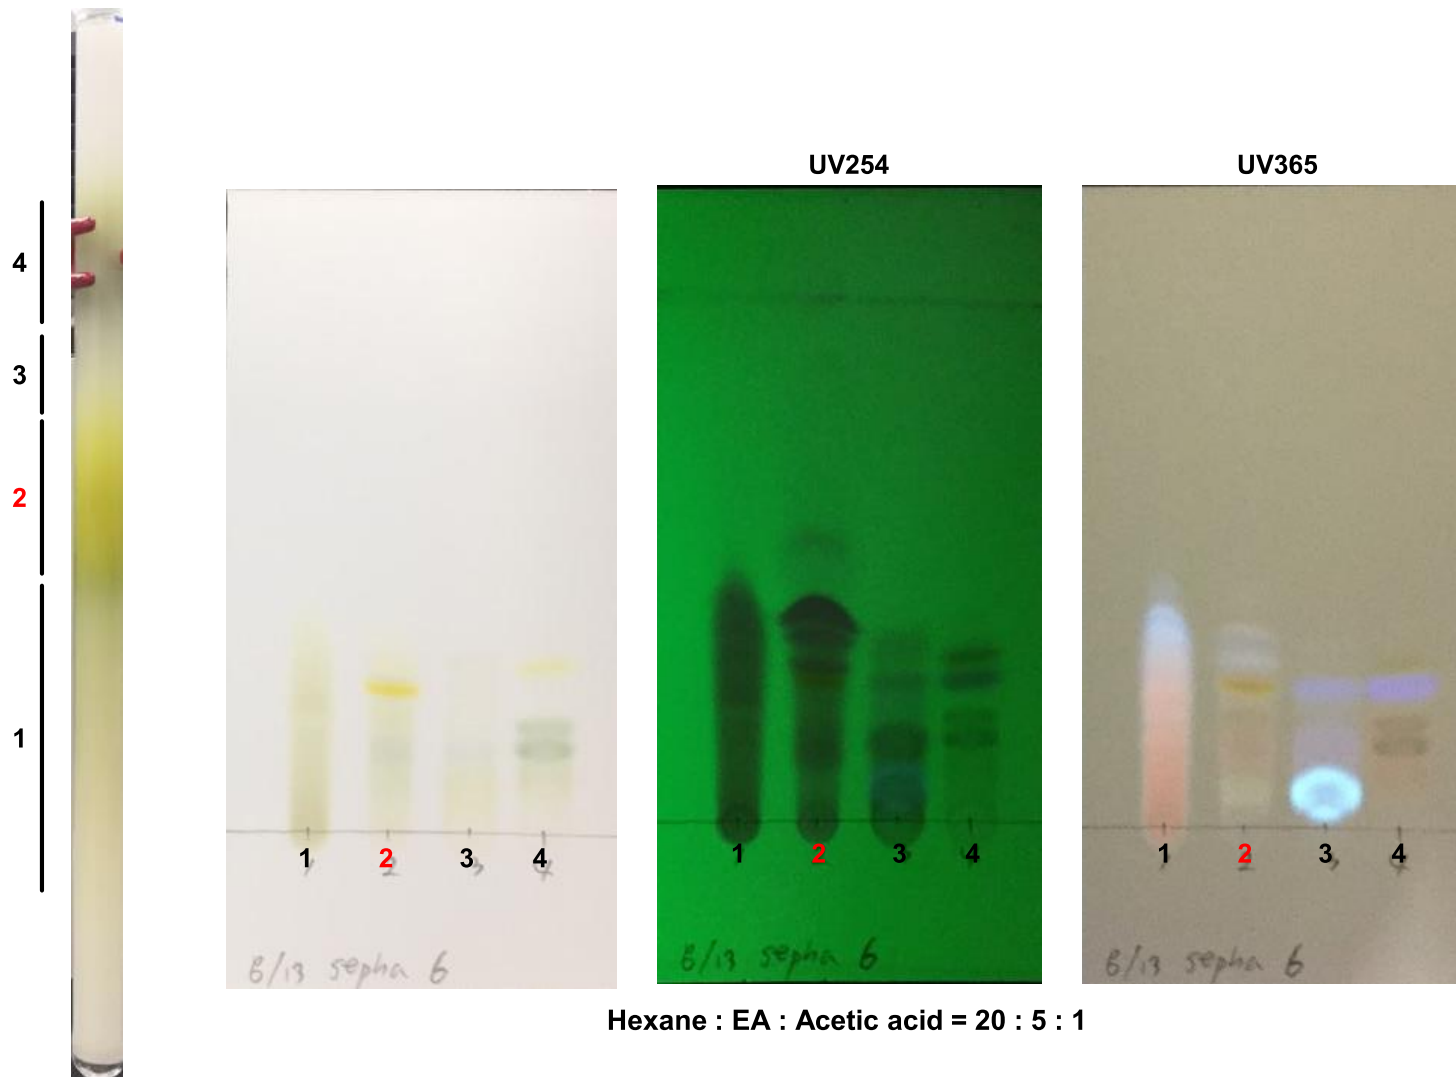

**Supplementary Figure S2. Purification procedure of antioxidant from *Salicornia herbacea* L. extracts using sephadex LH-20 gel chromatography eluted with MeOH. Active fraction: #2.**

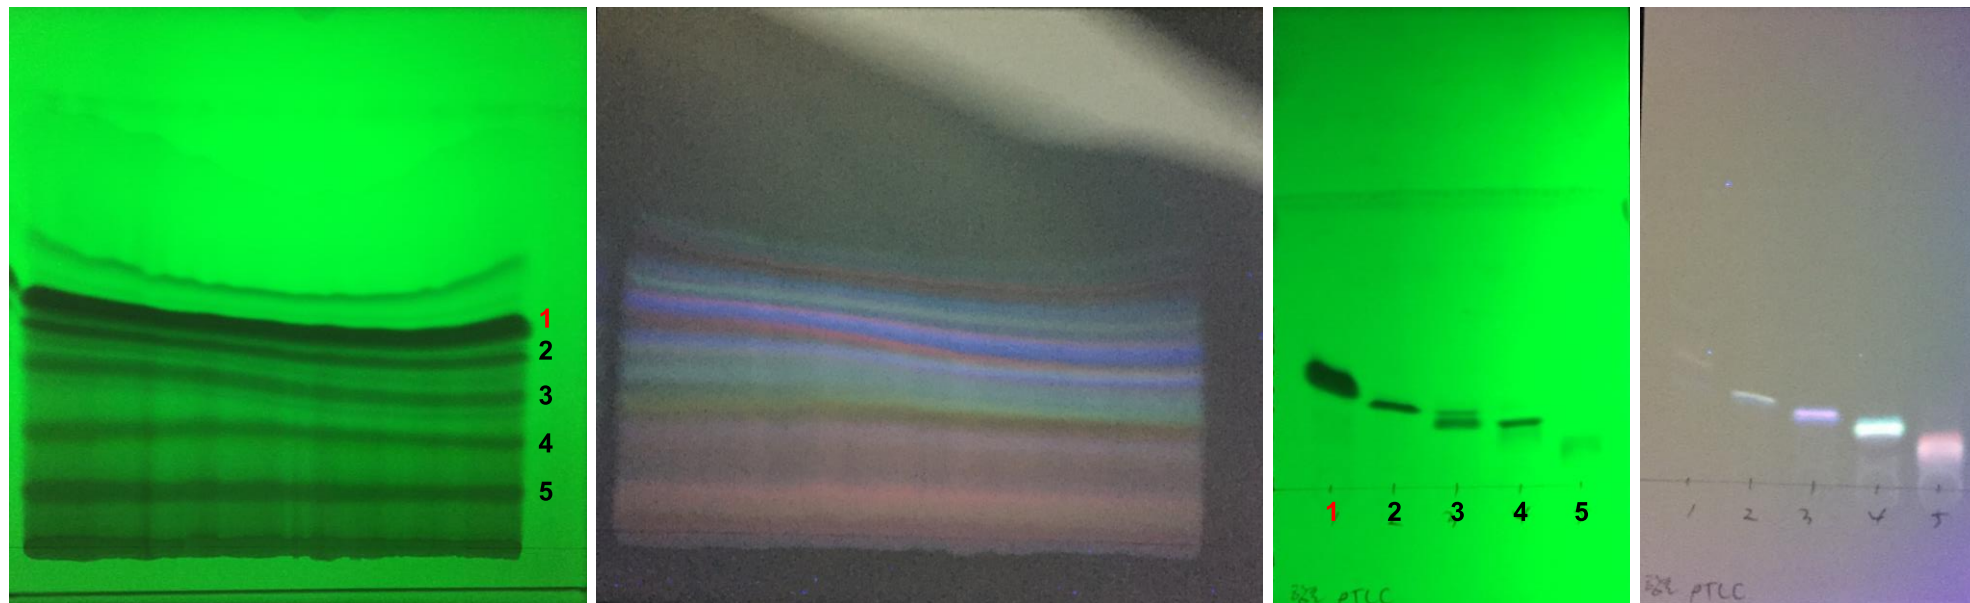

Hexane : EA : Acetic acid = 15 : 5 : 1

Hexane : EA : Acetic acid = 20 : 5 : 1

**Supplementary Figure S3. Purification procedure of antioxidant from the *Salicornia herbacea* L. extracts using preparative thin layer chromatography with  $\text{CHCl}_3$ :MeOH (20:1). Active fraction: #1.**

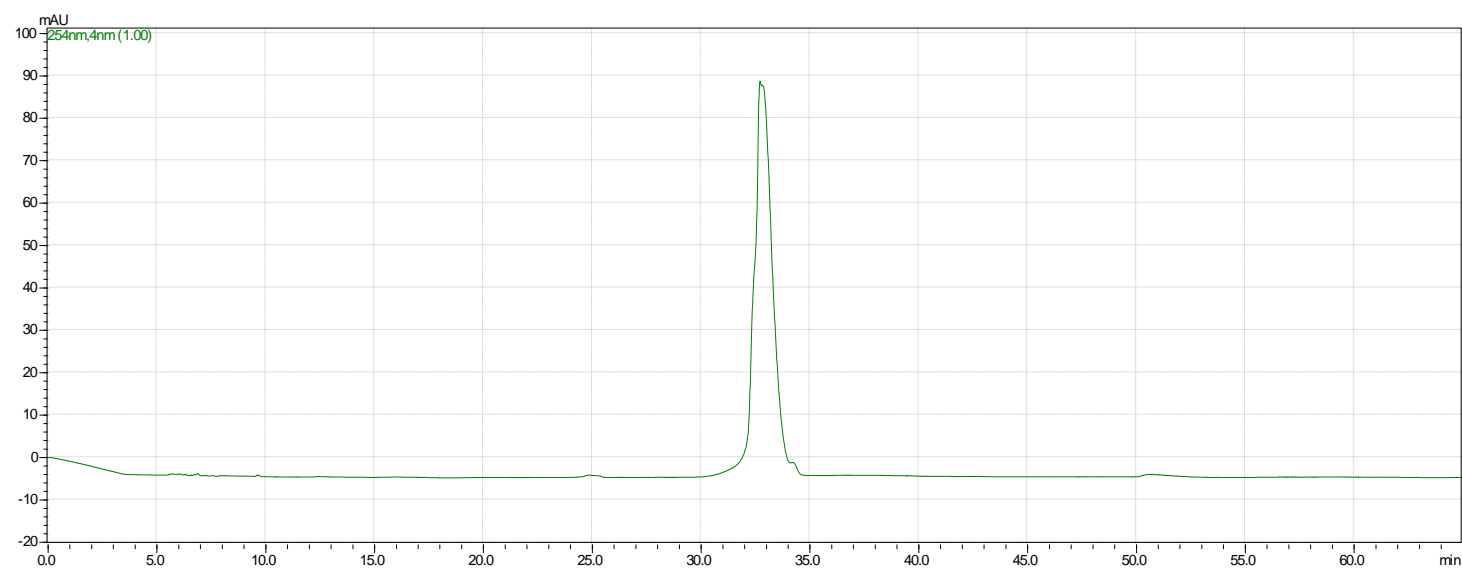

**Supplementary Figure S4. Purification procedure of antioxidant from from the *Salicornia herbacea* L. extracts using Preparatory HPLC with acetonitrile.**

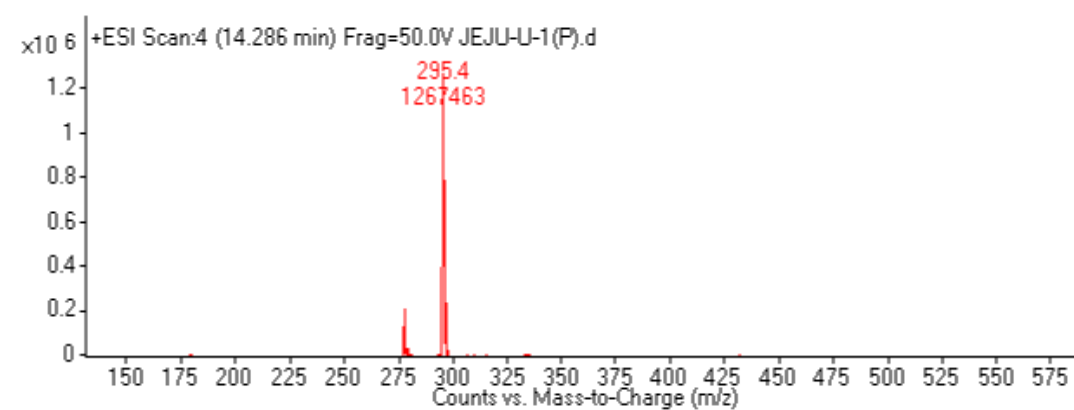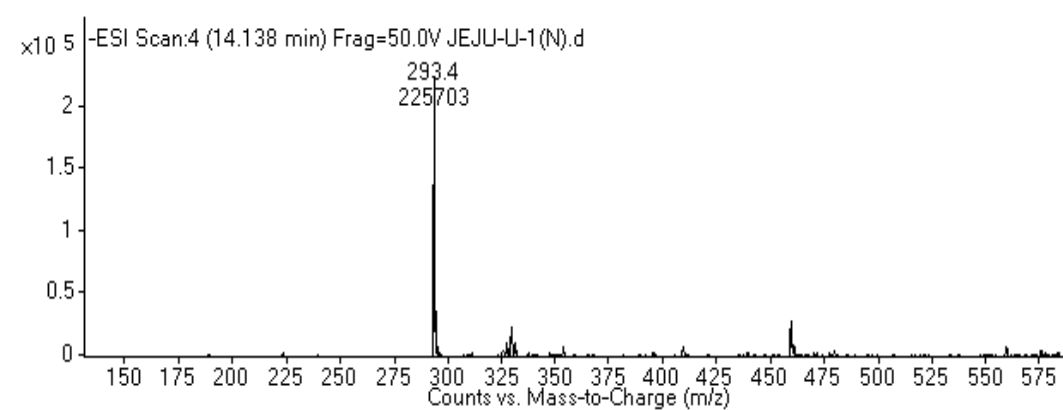

**Supplementary Figure S5. ESI-mass spectrometry of the purified sample.**

### $^1\text{H}$ -NMR

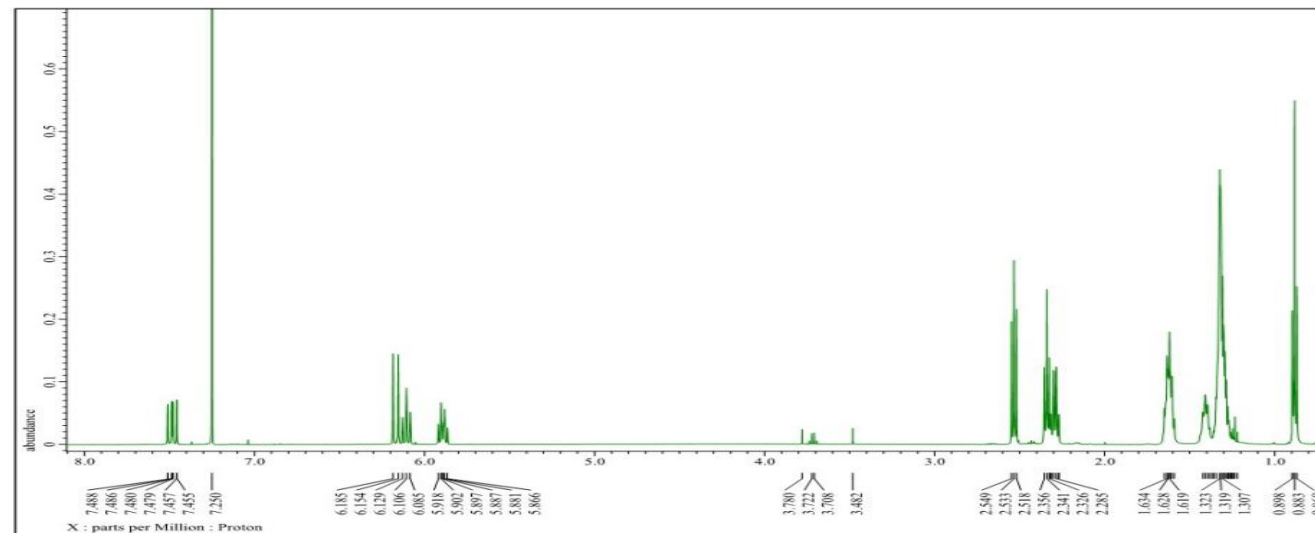

### $^{13}\text{C}$ -NMR

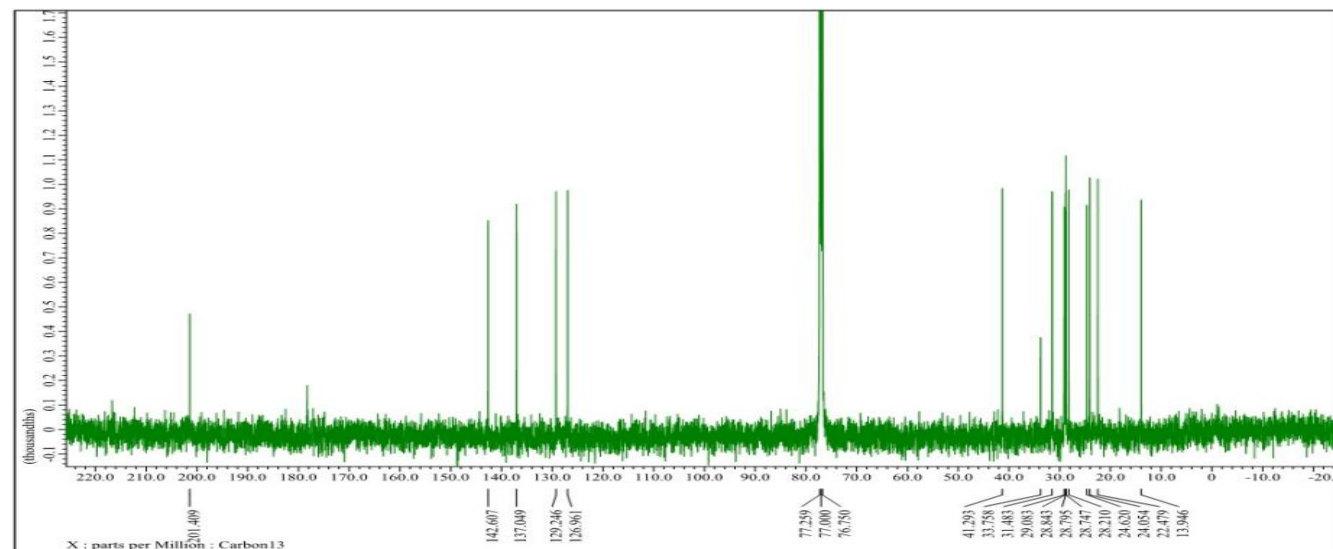

Supplementary Figure S6.  $^1\text{H}$  NMR and  $^{13}\text{C}$  NMR spectra of the purified sample.

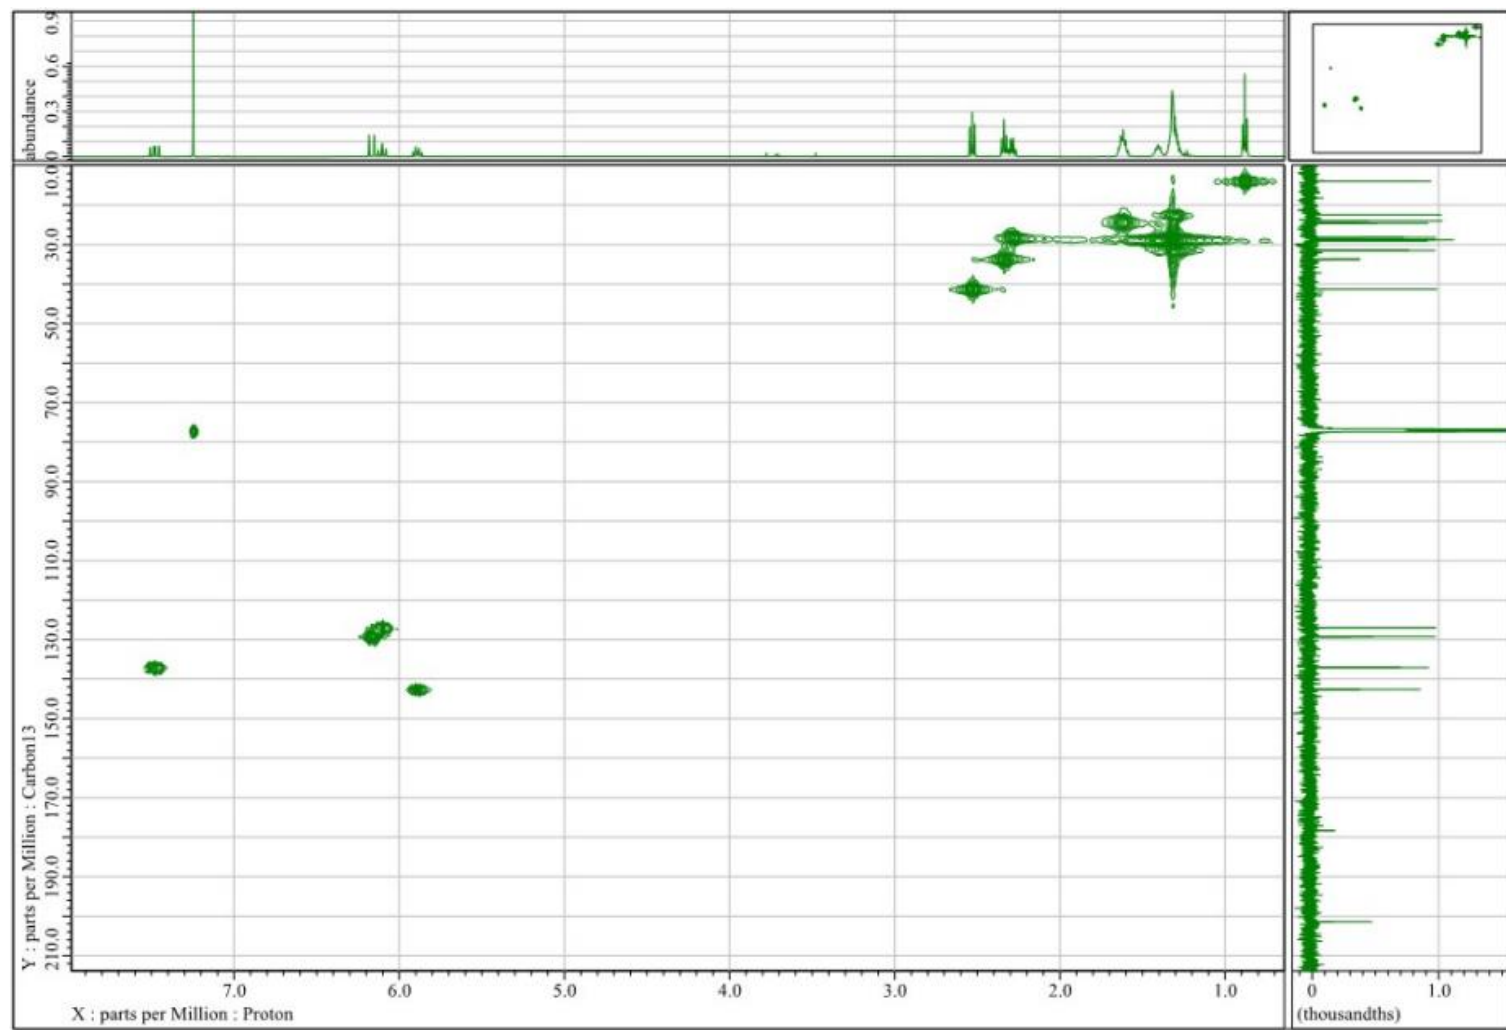

**Supplementary Figure S7. HMQC spectrum of the purified sample.**

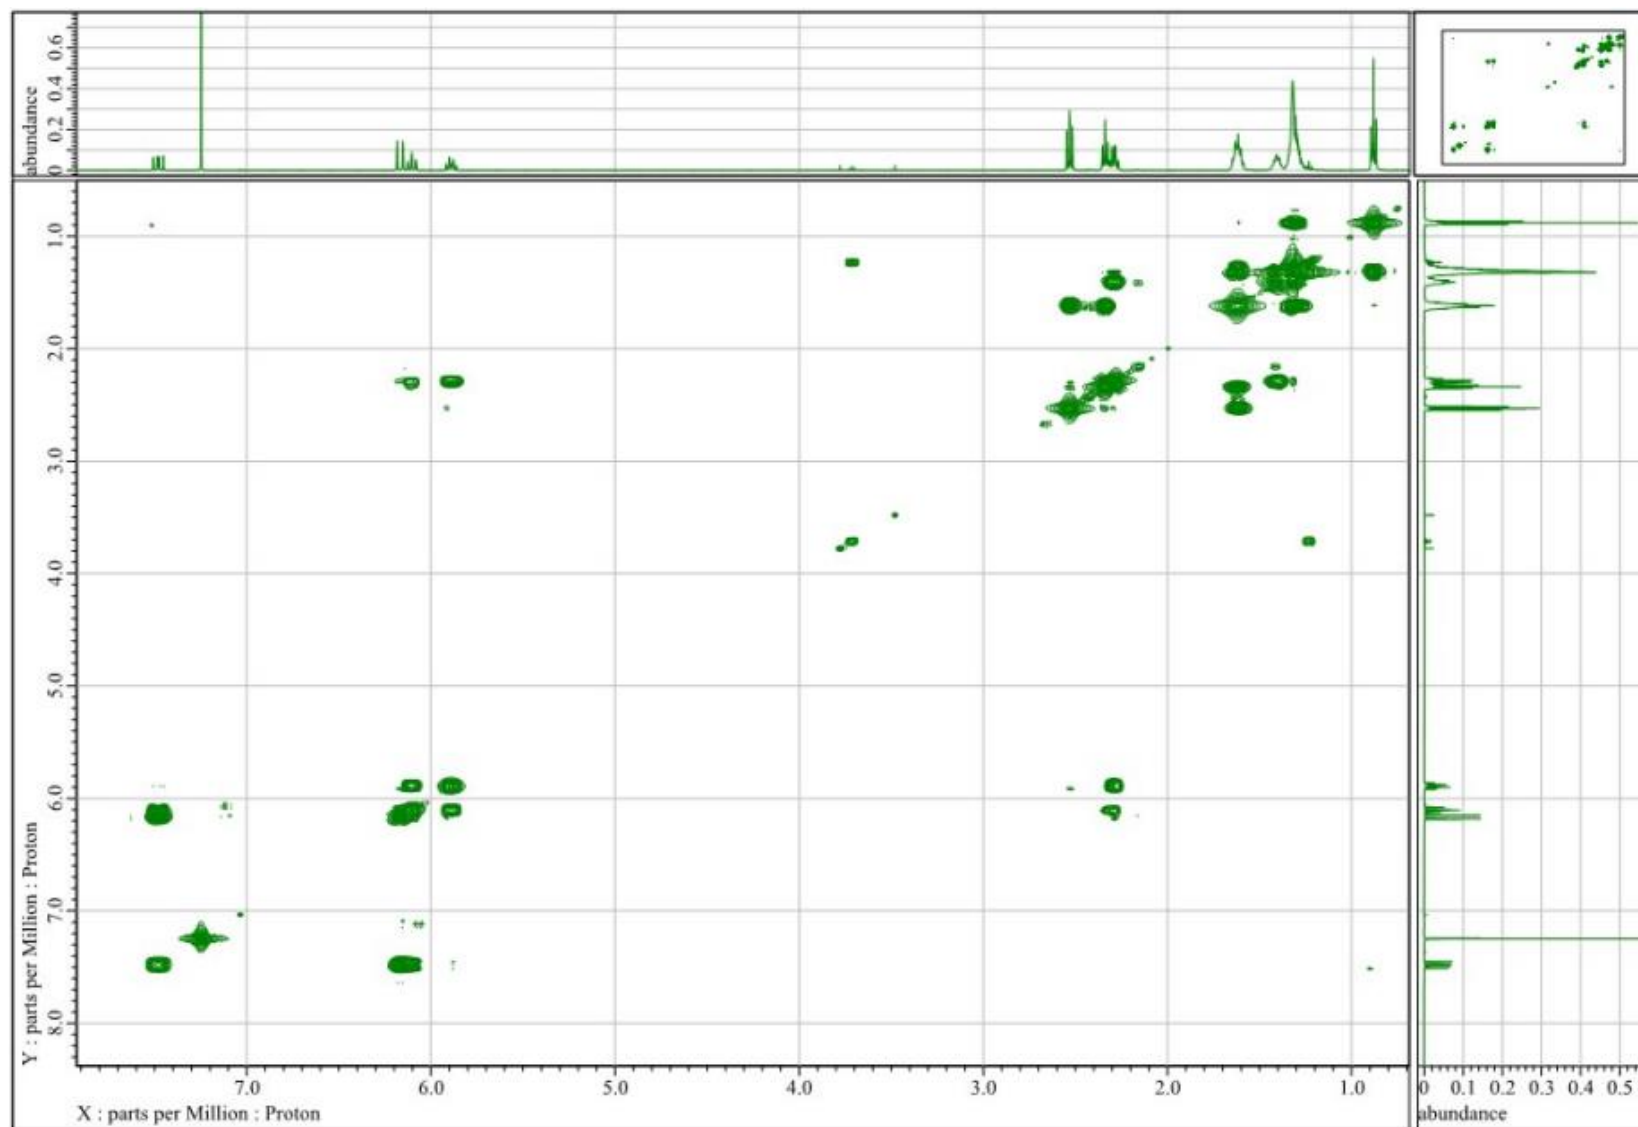

Supplementary Figure S8.  $^1\text{H}$ - $^1\text{H}$  COSY spectrum of the purified sample.

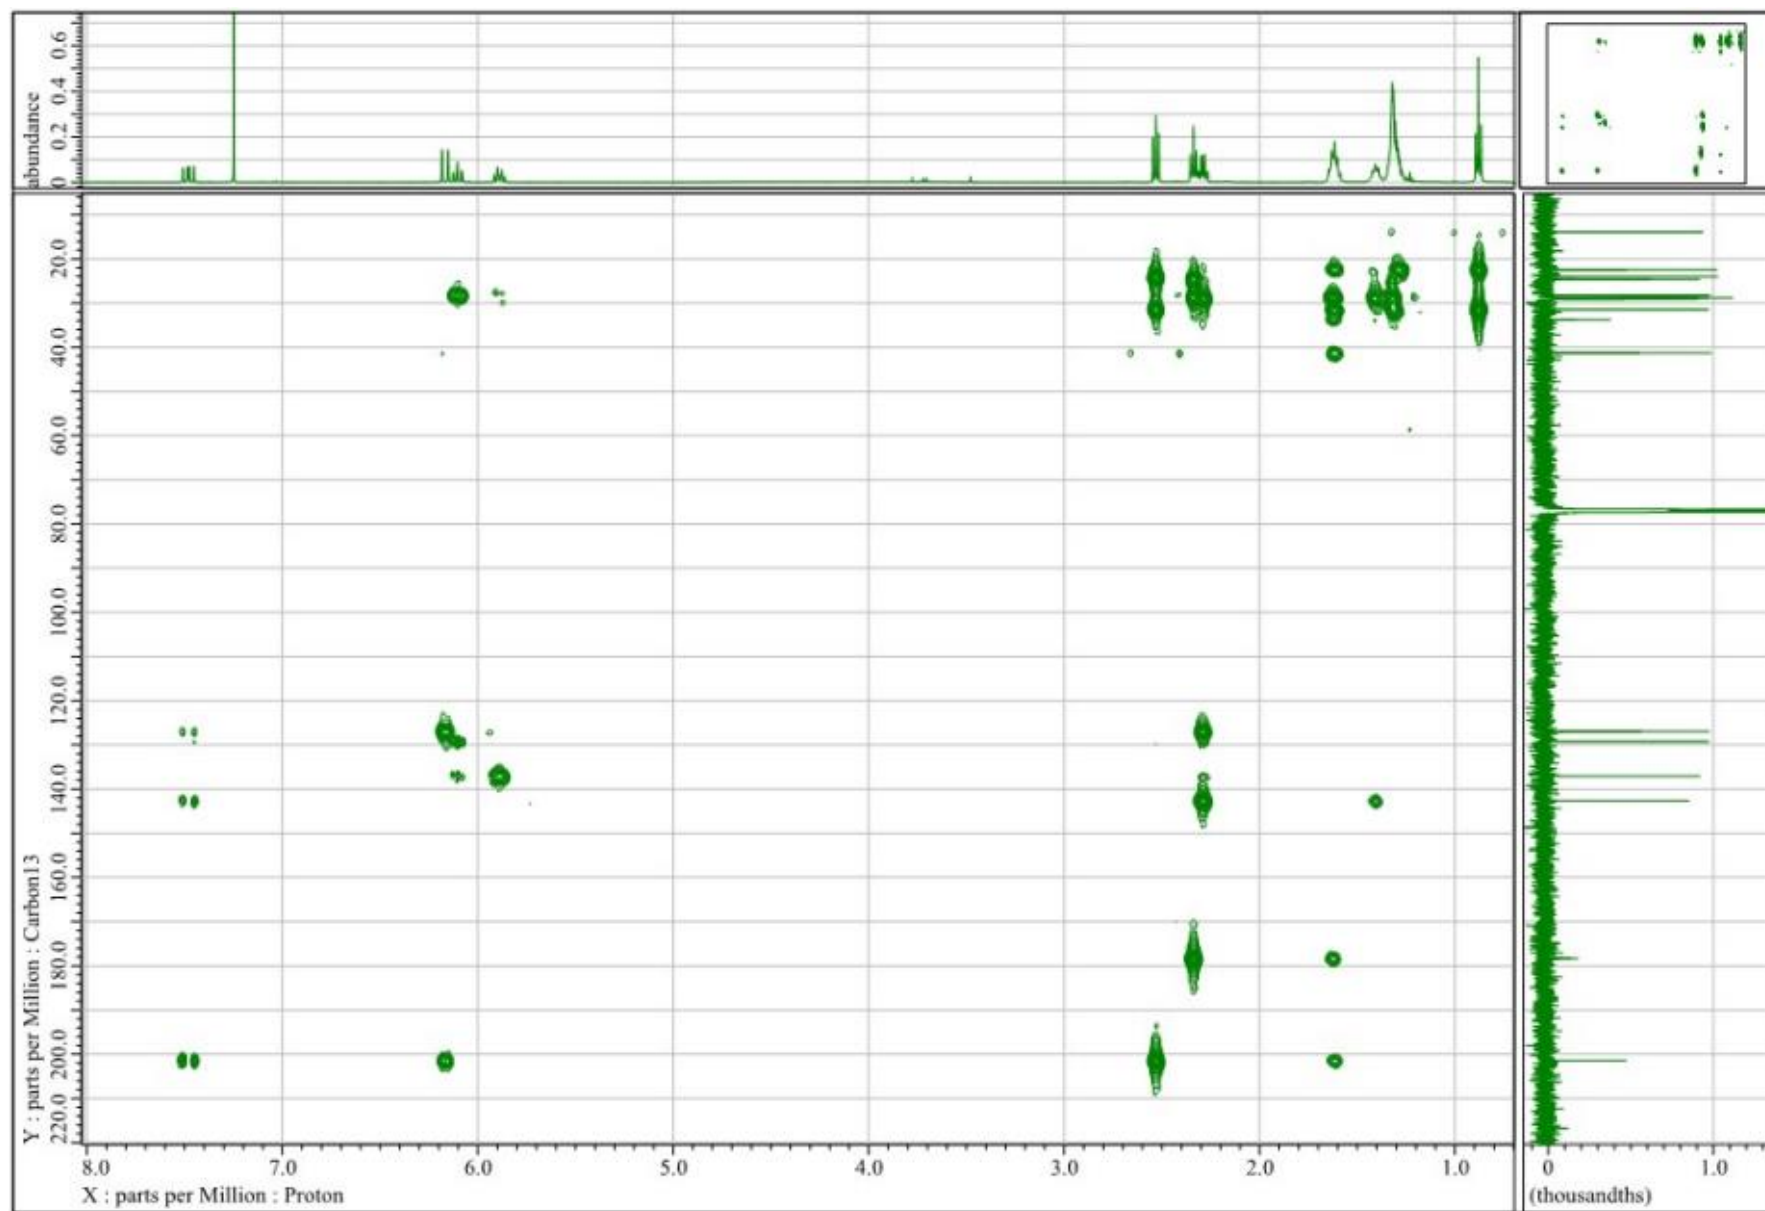

Supplementary Figure S9. HMBC spectrum of the purified sample.

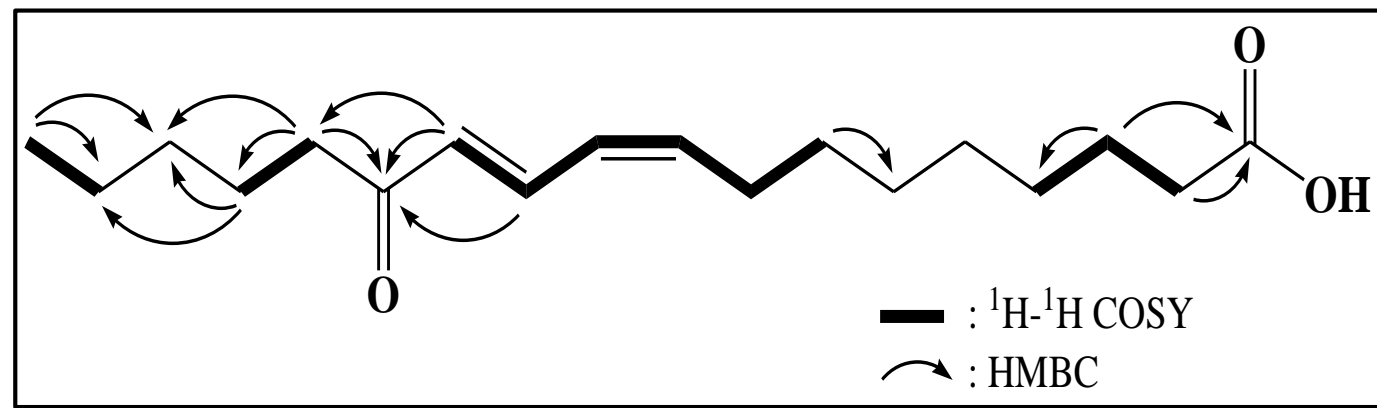

HMBC correlations

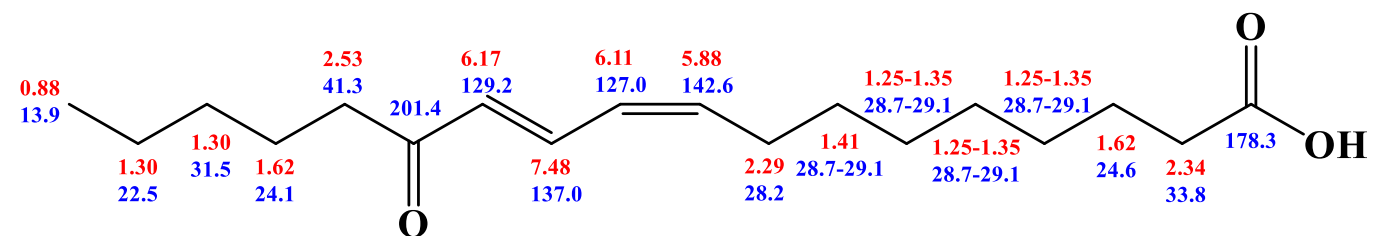

Supplementary Figure S10. HMBC correlations and  $^1\text{H}$  (red),  $^{13}\text{C}$  (blue) peak assignments of the purified sample.
